# Supplementary material for: Spatial Dissection of the Distinct Cellular Responses to Normal Aging and Alzheimer’s Disease in Human Prefrontal Cortex at Single-Nucleus Resolution
Source: bioRxiv or medRxiv preprint supplement (doi:10.1101/2024.05.21.24306783), 2024-05-22

**A**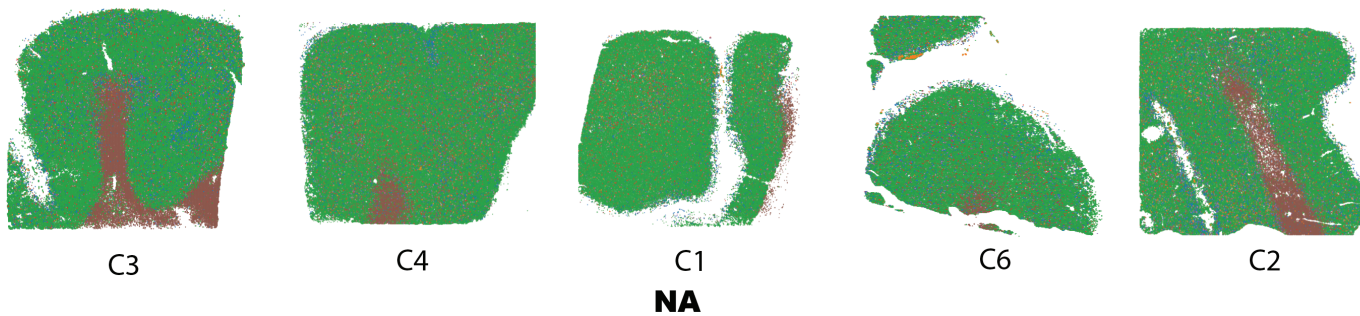**Moderate****Severe****B**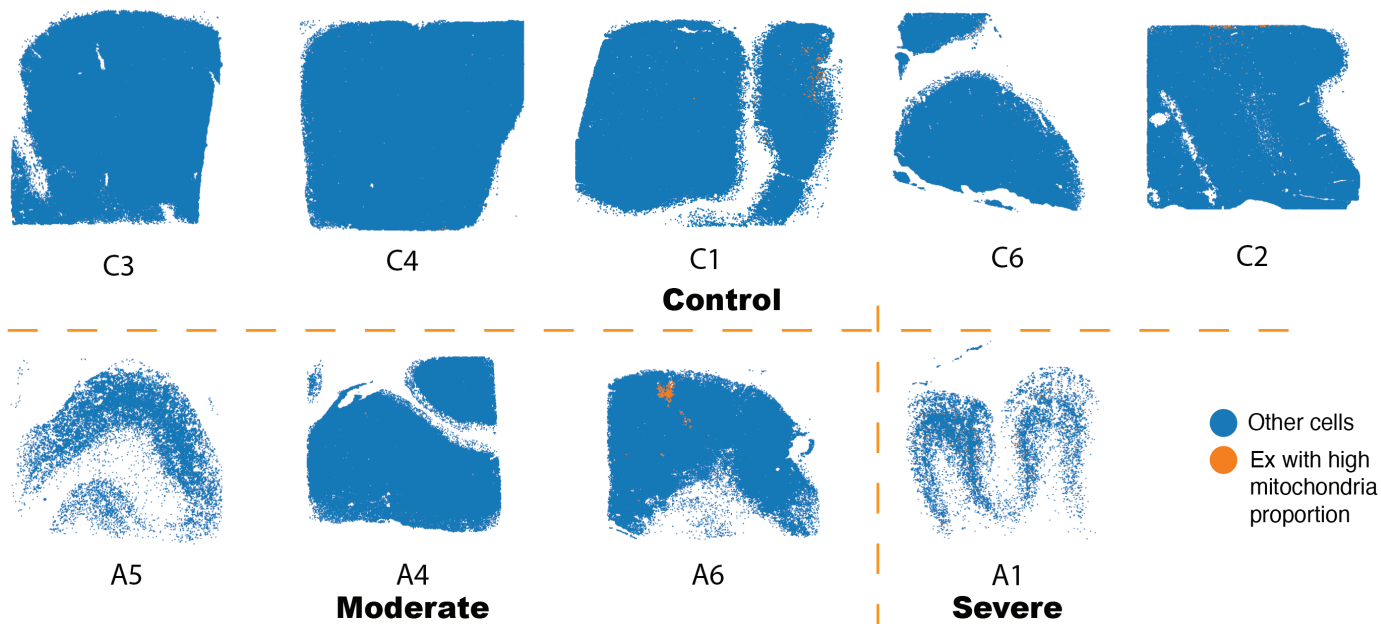

Supplement: Supplementary file [file media-3.pdf]
